# Supplementary material
Source: PubMed Central journal article supplement (PMC3181371)

SUPPL. FIGURE S1: Roy and Dittmer

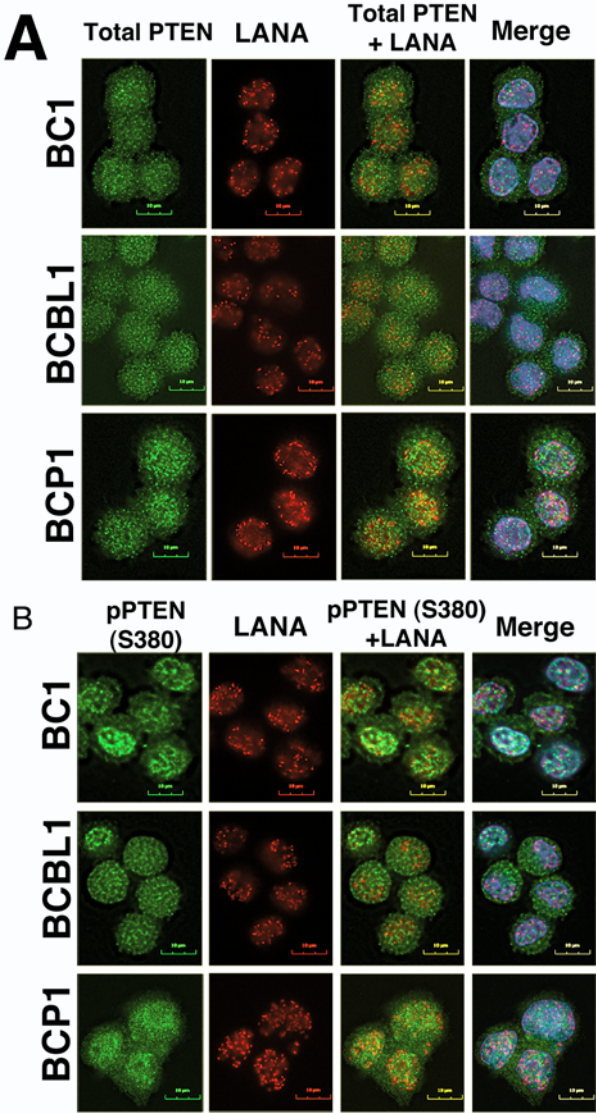

Supplement: mmc1.pdf [file mmc1.pdf]
